# Supplementary material for: Enhancer-Gene Interaction Analyses Identified the Epidermal Growth Factor Receptor as a Susceptibility Gene for Type 2 Diabetes Mellitus
Source: PubMed Central journal article supplement — Diabetes Metab J. 2020 Jun 10;45(2):241–50. doi: 10.4093/dmj.2019.0204 (PMC8024152; doi:10.4093/dmj.2019.0204), 2020-06-10
Supplement: dmj-2019-0204-s002.pdf [file dmj-2019-0204-s002.pdf]

**Supplementary Table 2.** The association between all EGFR polymorphisms and T2DM

| SNP        | GENEVA |         | IPM   |         | Combined P value <sup>a</sup> |
|------------|--------|---------|-------|---------|-------------------------------|
|            | OR     | P value | OR    | P value |                               |
| rs10244108 | 0.976  | 0.016   | 0.942 | 0.028   | 0.003                         |
| rs2110290  | 1.022  | 0.026   | 1.052 | 0.070   | 0.007                         |
| rs12671550 | 1.020  | 0.043   | 1.065 | 0.028   | 0.008                         |
| rs11487218 | 0.980  | 0.040   | 0.953 | 0.075   | 0.011                         |
| rs845558   | 1.021  | 0.032   | 1.028 | 0.291   | 0.018                         |
| rs6978771  | 1.023  | 0.038   | 1.026 | 0.375   | 0.024                         |
| rs12668421 | 1.021  | 0.051   | 1.029 | 0.312   | 0.030                         |
| rs6947594  | 1.028  | 0.049   | 1.028 | 0.458   | 0.035                         |
| rs12666347 | 1.014  | 0.171   | 1.066 | 0.020   | 0.038                         |
| rs7796139  | 0.983  | 0.117   | 0.951 | 0.084   | 0.040                         |
| rs13234622 | 1.014  | 0.154   | 1.054 | 0.049   | 0.045                         |
| rs9642391  | NA     | NA      | 0.949 | 0.051   | 0.051                         |
| rs6593210  | NA     | NA      | 0.947 | 0.051   | 0.051                         |
| rs10234806 | 0.988  | 0.286   | 0.923 | 0.005   | 0.052                         |
| rs17172446 | 0.977  | 0.043   | 0.999 | 0.966   | 0.055                         |
| rs883117   | 0.963  | 0.054   | 0.988 | 0.794   | 0.057                         |
| rs4947986  | 1.018  | 0.093   | 1.024 | 0.429   | 0.064                         |
| rs1107616  | NA     | NA      | 1.062 | 0.068   | 0.068                         |
| rs845552   | 1.012  | 0.188   | 1.043 | 0.089   | 0.070                         |
| rs17746476 | 0.966  | 0.071   | 0.988 | 0.794   | 0.074                         |
| rs11975042 | 0.966  | 0.070   | 0.988 | 0.806   | 0.074                         |
| rs2877260  | 0.986  | 0.184   | 0.956 | 0.126   | 0.078                         |
| rs11238349 | NA     | NA      | 1.046 | 0.097   | 0.097                         |
| rs845559   | 1.021  | 0.117   | NA    | NA      | 0.117                         |
| rs10488143 | 0.984  | 0.440   | 0.884 | 0.015   | 0.123                         |
| rs6954351  | 0.989  | 0.396   | 0.929 | 0.032   | 0.129                         |
| rs6593211  | NA     | NA      | 1.047 | 0.130   | 0.130                         |
| rs1107617  | 0.972  | 0.081   | 1.020 | 0.627   | 0.139                         |
| rs4947984  | 0.987  | 0.487   | 0.900 | 0.014   | 0.139                         |
| rs17518446 | 0.989  | 0.450   | 0.938 | 0.106   | 0.210                         |
| rs7786831  | 0.992  | 0.609   | 0.913 | 0.023   | 0.213                         |
| rs7801956  | 0.980  | 0.221   | NA    | NA      | 0.221                         |
| rs6948867  | NA     | NA      | 1.036 | 0.278   | 0.278                         |
| rs763317   | 0.991  | 0.363   | 0.983 | 0.508   | 0.280                         |
| rs11977660 | 1.010  | 0.294   | NA    | NA      | 0.294                         |
| rs35891645 | 0.982  | 0.137   | 1.039 | 0.234   | 0.316                         |
| rs11976696 | 0.979  | 0.063   | 1.074 | 0.023   | 0.322                         |
| rs17172432 | 1.014  | 0.247   | 0.990 | 0.752   | 0.325                         |

(Continued to the next page)

Supplementary Table 2. Continued

| SNP        | GENEVA |         | IPM   |         | Combined<br>P value <sup>a</sup> |
|------------|--------|---------|-------|---------|----------------------------------|
|            | OR     | P value | OR    | P value |                                  |
| rs2241055  | 0.998  | 0.856   | 0.943 | 0.018   | 0.335                            |
| rs917880   | 0.991  | 0.342   | NA    | NA      | 0.342                            |
| rs10488140 | 1.013  | 0.312   | 0.999 | 0.976   | 0.346                            |
| rs10280515 | 1.028  | 0.130   | 0.932 | 0.140   | 0.352                            |
| rs7809332  | 0.986  | 0.219   | 1.022 | 0.490   | 0.355                            |
| rs4947963  | 1.008  | 0.453   | 1.018 | 0.522   | 0.357                            |
| rs11760524 | 1.011  | 0.420   | 1.015 | 0.640   | 0.359                            |
| rs7804688  | 1.013  | 0.403   | 1.013 | 0.731   | 0.366                            |
| rs7783970  | 0.995  | 0.570   | 0.972 | 0.272   | 0.366                            |
| rs11770506 | 1.008  | 0.455   | 1.015 | 0.578   | 0.374                            |
| rs13244925 | 0.994  | 0.519   | 0.981 | 0.460   | 0.393                            |
| rs12534147 | 1.010  | 0.285   | 0.987 | 0.612   | 0.402                            |
| rs759169   | 0.989  | 0.416   | NA    | NA      | 0.416                            |
| rs12535328 | 1.010  | 0.316   | 0.986 | 0.594   | 0.443                            |
| rs12718947 | 1.008  | 0.466   | NA    | NA      | 0.466                            |
| rs35699152 | 0.987  | 0.278   | 1.032 | 0.326   | 0.488                            |
| rs3823585  | 1.005  | 0.625   | 1.018 | 0.496   | 0.491                            |
| rs883118   | 1.007  | 0.495   | NA    | NA      | 0.495                            |
| rs17746482 | 0.989  | 0.460   | 1.004 | 0.922   | 0.507                            |
| rs1558544  | 1.007  | 0.540   | 1.006 | 0.835   | 0.517                            |
| rs10229932 | 0.992  | 0.617   | 0.979 | 0.617   | 0.523                            |
| rs759166   | 0.986  | 0.230   | 1.049 | 0.139   | 0.526                            |
| rs759162   | 1.006  | 0.563   | 1.008 | 0.804   | 0.530                            |
| rs1997083  | 0.980  | 0.143   | 1.103 | 0.024   | 0.534                            |
| rs980653   | 0.996  | 0.758   | 0.970 | 0.368   | 0.554                            |
| rs10277413 | 1.003  | 0.730   | 0.937 | 0.009   | 0.581                            |
| rs12718939 | 0.983  | 0.083   | 1.102 | 0.001   | 0.595                            |
| rs2072454  | 1.000  | 0.992   | 0.962 | 0.122   | 0.597                            |
| rs11771471 | 1.001  | 0.934   | 1.035 | 0.207   | 0.616                            |
| rs2075109  | 1.000  | 0.964   | 0.960 | 0.110   | 0.621                            |
| rs17586344 | 0.987  | 0.299   | 1.064 | 0.132   | 0.637                            |
| rs2740764  | 1.005  | 0.642   | NA    | NA      | 0.642                            |
| rs2075110  | 1.001  | 0.930   | 0.960 | 0.109   | 0.649                            |
| rs17586365 | 1.006  | 0.658   | NA    | NA      | 0.658                            |
| rs6960438  | 0.988  | 0.295   | 1.058 | 0.082   | 0.687                            |
| rs2877261  | 1.000  | 0.999   | 1.032 | 0.248   | 0.698                            |
| rs10488142 | 1.009  | 0.552   | 0.979 | 0.558   | 0.717                            |
| rs11536635 | 1.004  | 0.719   | NA    | NA      | 0.719                            |

(Continued to the next page)

Supplementary Table 2. Continued

| SNP        | GENEVA |         | IPM   |         | Combined P value <sup>a</sup> |
|------------|--------|---------|-------|---------|-------------------------------|
|            | OR     | P value | OR    | P value |                               |
| rs11982525 | 0.993  | 0.568   | 1.021 | 0.551   | 0.735                         |
| rs12538489 | 1.014  | 0.306   | 0.934 | 0.061   | 0.737                         |
| rs7795743  | 0.999  | 0.912   | 1.036 | 0.196   | 0.742                         |
| rs41324647 | 0.985  | 0.315   | 1.096 | 0.055   | 0.763                         |
| rs11506105 | 1.004  | 0.665   | 0.989 | 0.677   | 0.788                         |
| rs759167   | 0.992  | 0.465   | 1.043 | 0.167   | 0.823                         |
| rs12535226 | 1.007  | 0.461   | 0.964 | 0.135   | 0.847                         |
| rs729969   | 1.010  | 0.463   | 0.943 | 0.127   | 0.857                         |
| rs11767730 | 1.006  | 0.588   | 0.974 | 0.324   | 0.858                         |
| rs7809028  | 0.991  | 0.546   | 1.056 | 0.237   | 0.864                         |
| rs6970262  | 1.003  | 0.769   | 0.967 | 0.185   | 0.866                         |
| rs1525643  | 1.007  | 0.504   | 0.964 | 0.164   | 0.871                         |
| rs4140770  | 0.995  | 0.585   | 1.030 | 0.272   | 0.884                         |
| rs7795728  | 0.999  | 0.889   | NA    | NA      | 0.889                         |
| rs1534130  | 1.002  | 0.894   | NA    | NA      | 0.894                         |
| rs11768038 | 1.004  | 0.726   | 0.964 | 0.169   | 0.895                         |
| rs7781264  | 1.002  | 0.826   | 0.973 | 0.327   | 0.903                         |
| rs17172438 | 1.006  | 0.623   | 0.959 | 0.238   | 0.947                         |
| rs759170   | 1.004  | 0.761   | 0.975 | 0.493   | 0.954                         |
| rs7785013  | 1.003  | 0.830   | 0.975 | 0.491   | 0.977                         |
| rs2293347  | 0.994  | 0.692   | 1.058 | 0.246   | 0.987                         |
| rs940806   | 1.004  | 0.680   | 0.971 | 0.238   | 0.994                         |
| rs868254   | 1.003  | 0.773   | 0.979 | 0.424   | 0.998                         |

EGFR, epidermal growth factor receptor; T2DM, type 2 diabetes mellitus; SNP, single nucleotide polymorphism; GENEVA, Gene Environment Association Studies initiative in Type 2 Diabetes; IPM, Biobank Program of the Institute of Personalized Medicine; OR, odds ratio; NA, not available.

<sup>a</sup>Meta-analyses results by using two genome-wide association study samples.
