# Supplementary material for: Enhancer-Gene Interaction Analyses Identified the Epidermal Growth Factor Receptor as a Susceptibility Gene for Type 2 Diabetes Mellitus
Source: PubMed Central journal article supplement — Diabetes Metab J. 2020 Jun 10;45(2):241–50. doi: 10.4093/dmj.2019.0204 (PMC8024152; doi:10.4093/dmj.2019.0204), 2020-06-10
Supplement: dmj-2019-0204-s003.pdf [file dmj-2019-0204-s003.pdf]

**Supplementary Table 3.** The interaction effects of the previously identified SNP pairs

| SNP1      | SNP2      | D'   | GENEVA           |                | IPM              |                | Combined<br><i>P</i> value <sup>a</sup> |
|-----------|-----------|------|------------------|----------------|------------------|----------------|-----------------------------------------|
|           |           |      | OR (95% CI)      | <i>P</i> value | OR (95% CI)      | <i>P</i> value |                                         |
| rs7991210 | rs4772265 | 0.96 | 0.95 (0.92–0.98) | 0.0018         | 0.96 (0.88–1.06) | 0.43           | 1.01 × 10 <sup>-5</sup>                 |
|           | rs4772268 | 0.76 | 1.05 (1.02–1.08) | 0.0038         | 0.92 (0.84–1.00) | 0.04           | 4.26 × 10 <sup>-5</sup>                 |

SNP, single nucleotide polymorphism; SNP2, SNPs that in linkage disequilibrium (LD) with previously identified promoter SNP (rs3742250); D', coefficient of LD between SNP2 and rs3742250 in 1000 Genomes Phase 3; GENEVA, Gene Environment Association Studies initiative in Type 2 Diabetes; IPM, Biobank Program of the Institute of Personalized Medicine; OR, odds ratio; CI, confidence interval.

<sup>a</sup>Meta-analysis results by using two genome-wide association study samples.
